# Supplementary material for: An Injectable Hyaluronan–Methylcellulose (HAMC) Hydrogel Combined with Wharton’s Jelly-Derived Mesenchymal Stromal Cells (WJ-MSCs) Promotes Degenerative Disc Repair
Source: MDPI journal article supplement (doi:10.3390/ijms21197391), 2020-10-07
Supplement: s1 [file s1]

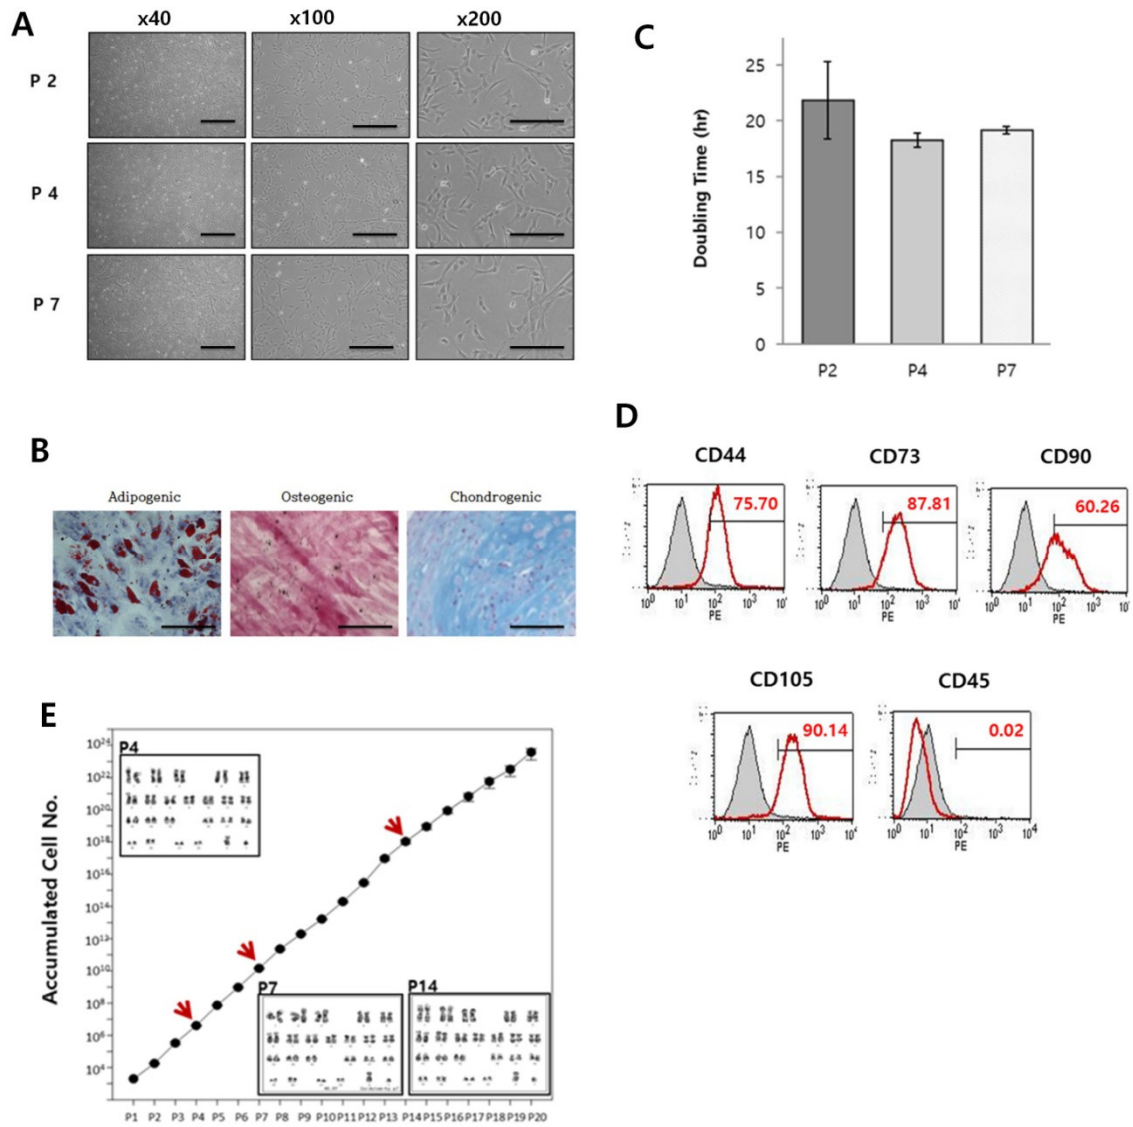

**Figure S1.** (A) Morphology of WJ-MSCs in the second, fourth, and seventh generation. P2, second generation; P4; fourth generation; P7; seventh generation (lens:×40,×100 and ×200 respectively). (B) Cellular multipotent differentiation of WJ-MSCs. Following adipogenic induction for 14 days, WJ-MSCs were positive for Oil red-O staining. Following osteogenic and chondrogenic induction for 14 days, WJ-MSCs were positive for alizarin red staining and alcian blue staining, respectively. Scale bars, 10  $\mu$ m. (C) cell population doubling time. (D) flow cytometric analysis of cell surface markers of WJ-MSCs at P7. (E) chromosome karyotype analysis of the cultured WJ-MSCs.
